# Supplementary material for: Rubber-enhanced polyamide nanofibers for a significant improvement of CFRP interlaminar fracture toughness
Source: Springer Nature journal article supplement (doi:10.1038/s41598-022-25287-y), 2022-12-11
Supplement: MOESM1 [file 41598_2022_25287_MOESM1_ESM.pdf]

**Rubber-enhanced polyamide nanofibers for a significant improvement  
of CFRP interlaminar fracture toughness**

Emanuele Maccaferri<sup>a,\*</sup>, Matteo Dalle Donne<sup>a</sup>, Laura Mazzocchetti<sup>a,b,\*</sup>,  
Tiziana Benelli<sup>a,b</sup>, Tommaso Maria Brugo<sup>b,c</sup>, Andrea Zucchelli<sup>b,c</sup>, Loris Giorgini<sup>a,b</sup>

<sup>a</sup> *Department of Industrial Chemistry “Toso Montanari”, University of Bologna, Viale Risorgimento 4,  
40136 Bologna, Italy.*

<sup>b</sup> *Interdepartmental Center for Industrial Research on Advanced Applications in Mechanical  
Engineering and Materials Technology, CIRI-MAM, University of Bologna, Viale Risorgimento 2,  
40136 Bologna, Italy.*

<sup>c</sup> *Department of Industrial Engineering, University of Bologna, Viale Risorgimento 2, 40136 Bologna,  
Italy.*

\* Corresponding authors: [emanuele.maccaferri3@unibo.it](mailto:emanuele.maccaferri3@unibo.it)  
[laura.mazzocchetti@unibo.it](mailto:laura.mazzocchetti@unibo.it)

### Production of CFRP laminates for DCB, ENF, 3PB and DMA tests

CFRP panels for DCB tests were produced via hand lay-up in an air-conditioned room (23-25 °C, RH 22-25%). The nanofibrous membranes were directly applied with their paper substrate onto the prepreg during the hand lay-up. Before the addition of the next prepreg ply, the supporting paper was removed. To favour the impregnation of the nanofibrous mat, uncured panels underwent a preliminary treatment of 2 h at 45 °C under vacuum before curing cycle in autoclave. Then, they were cured in an autoclave (2 h at 135 °C, under vacuum, 6 bar external pressure, heating/cooling ramp 2 °C/min).

CFRP panels for DCB tests (Figure S1), 140 × 190 mm, are constituted by 14 CFRP plies in total. Only the central interface was modified with the nanofibrous mat. A Teflon film was used as a crack trigger. The specimens were obtained by cutting out the panel; edge parts (minimum 15 mm) were discarded to avoid any inhomogeneity.

DCB specimens have the following final dimensions: 130 mm total length, 20 mm width ( $b$ ), 45 mm initial crack length ( $a_0$ ). Aluminum blocks were fixed to the DCB specimen with epoxy resin glue to anchor the specimen on the testing machine.

ENF specimens had the following dimensions: 160 mm total length, 20 mm width ( $b$ ), 45 mm initial crack length ( $a_0$ ).

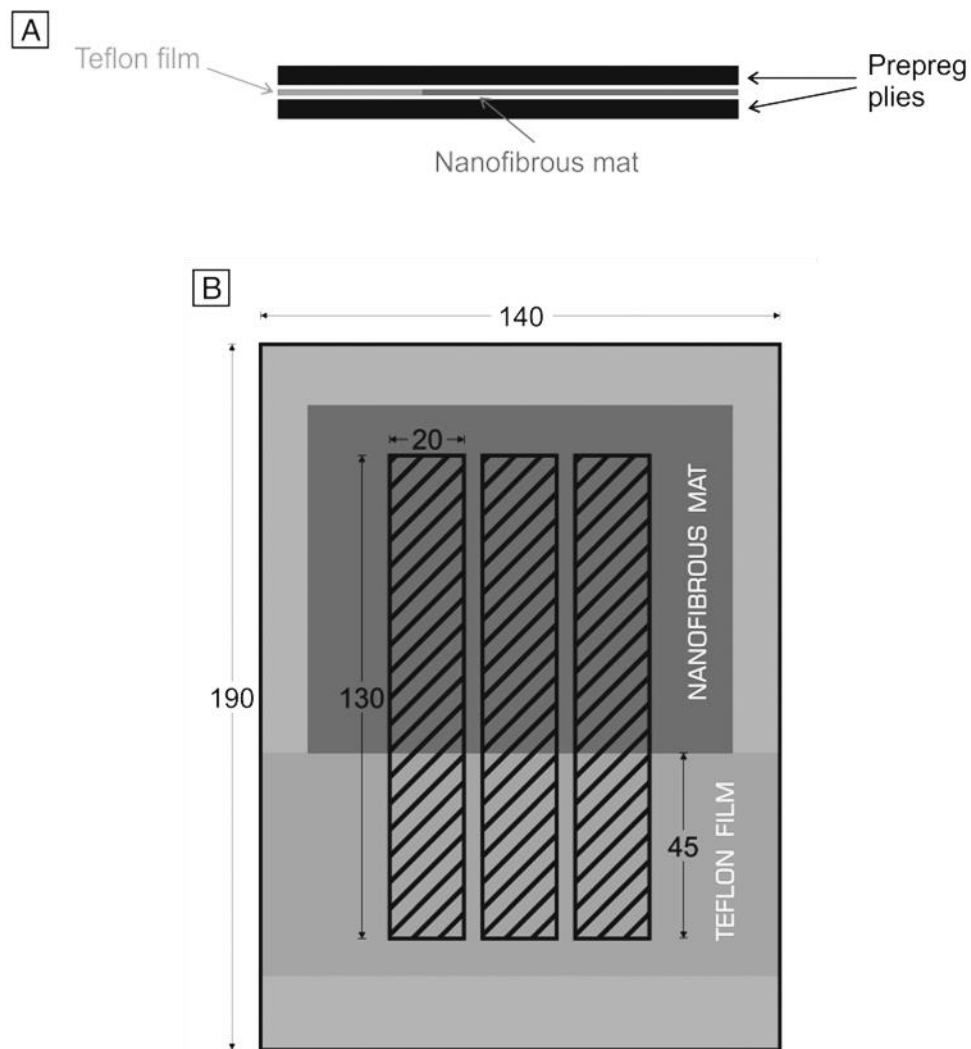

Fig. S1 – CFRP panels for characterization of delamination resistance: laminate section view (A) and dimensions (in mm) of panels and specimens for DCB test (B).

Table S1 – Mat characteristics before and after their impregnation with NBR solutions at 0.2% wt and 1.0% wt.

| Nanofibrous mat | Nylon mat grammage (g/m <sup>2</sup> ) | Loaded rubber (% wt)          |                               | Ratio B/A |
|-----------------|----------------------------------------|-------------------------------|-------------------------------|-----------|
|                 |                                        | (A) with 0.2% wt NBR solution | (B) with 1.0% wt NBR solution |           |
| NyAcF_40        | 10.8 ± 0.7                             | 2-5                           | 14-24                         | ≈ 5       |
| NyAcF_90        | 25.7 ± 0.8                             | 4-7                           | 20-25                         | ≈ 4       |
| NyTFA_40        | 11.4 ± 0.8                             | 2-4                           | 15-22                         | ≈ 6       |
| NyTFA_90        | 26.6 ± 0.9                             | 4-7                           | 18-27                         | ≈ 4       |

Table S2 – DCB test results of CFRPs nanomodified with NyTFA membranes.

| CFRP sample  | Max. Load (N) | G <sub>I,C</sub> (J/m <sup>2</sup> ) | G <sub>I,R</sub> (J/m <sup>2</sup> ) |
|--------------|---------------|--------------------------------------|--------------------------------------|
| C-Ref        | 41.1 ± 1.2    | 508 ± 19                             | 506 ± 62                             |
| NyTFA_10     | 49.7 ± 1.0    | 485 ± 52                             | 784 ± 59                             |
| NyTFA_10/3.0 | 53.4 ± 3.3    | 654 ± 169                            | 1057 ± 130                           |
| NyTFA_10/7.0 | 57.8 ± 2.5    | 705 ± 158                            | 1262 ± 241                           |
| NyTFA_20     | 47.8 ± 1.3    | 708 ± 59                             | 773 ± 81                             |
| NyTFA_20/3.0 | 60.0 ± 0.9    | 935 ± 126                            | 1270 ± 158                           |
| NyTFA_20/7.0 | 49.2 ± 7.5    | 638 ± 80                             | 1007 ± 184                           |
| NyTFA_40     | 39.8 ± 0.9    | 448 ± 38                             | 591 ± 111                            |
| NyTFA_40/3.0 | 57.3 ± 1.7    | 806 ± 26                             | 1300 ± 217                           |
| NyTFA_40/7.0 | 55.2 ± 7.7    | 927 ± 277                            | 1247 ± 348                           |

Table S3 – DCB test results of CFRPs nanomodified with NyAcF membranes.

| CFRP sample  | Max. Load<br>(N) |        | $G_{I,C}$<br>(J/m <sup>2</sup> ) | $G_{I,R}$<br>(J/m <sup>2</sup> ) |
|--------------|------------------|--------|----------------------------------|----------------------------------|
|              | Mean ± SD        | CV [%] |                                  |                                  |
| C-Ref        | 41.1 ± 1.2       |        | 508 ± 19                         | 506 ± 62                         |
| NyAcF_10     | 45.0 ± 4.4       |        | 560 ± 118                        | 670 ± 68                         |
| NyAcF_10/3.0 | 52.4 ± 2.5       |        | 769 ± 107                        | 1061 ± 117                       |
| NyAcF_10/7.0 | 55.3 ± 2.8       |        | 734 ± 131                        | 1273 ± 172                       |
| NyAcF_20     | 41.6 ± 1.3       |        | 530 ± 43                         | 685 ± 72                         |
| NyAcF_20/3.0 | 59.2 ± 2.3       |        | 968 ± 230                        | 1427 ± 151                       |
| NyAcF_20/7.0 | 34.6 ± 2.2       |        | 412 ± 55                         | 646 ± 239                        |
| NyAcF_40     | 51.8 ± 3.9       |        | 710 ± 89                         | 829 ± 86                         |
| NyAcF_40/3.0 | 52.0 ± 1.0       |        | 850 ± 43                         | 1090 ± 201                       |
| NyAcF_40/7.0 | 34.7 ± 4.1       |        | 377 ± 94                         | 382 ± 78                         |

Table S4 – Tensile properties of plain Nylon 66 mats.

| Membrane<br>type | $E$ [MPa] |        | $\sigma_{max}$ [MPa] |        | $\epsilon\sigma_{max}$ [%] |        | $U$ [J cm <sup>-3</sup> ] |        |
|------------------|-----------|--------|----------------------|--------|----------------------------|--------|---------------------------|--------|
|                  | Mean ± SD | CV [%] | Mean ± SD            | CV [%] | Mean ± SD                  | CV [%] | Mean ± SD                 | CV [%] |
| NyAcF            | 723 ± 98  | 13     | 42 ± 6               | 6      | 22 ± 2                     | 9      | 7.9 ± 1.2                 | 15     |
| NyTFA            | 512 ± 61  | 12     | 32 ± 2               | 6      | 34 ± 2                     | 5      | 8.3 ± 0.6                 | 7      |
